# Supplementary material
Source: PubMed Central journal article supplement (PMC4031273)
Supplement: NIHMS542334-supplement-Supplemental_Data_File___doc___tif__pdf__etc__.pdf [file NIHMS542334-supplement-Supplemental_Data_File___doc___tif__pdf__etc__.pdf]

Appendix

Table 1. Value of Physical Functioning by Respondent Characteristics

| Attribute | Level | Gender |       |         | Age in Years |         |         | Hispanic Ethnicity |       |         | Non-Hispanic Race |       |         |
|-----------|-------|--------|-------|---------|--------------|---------|---------|--------------------|-------|---------|-------------------|-------|---------|
|           |       | Fem    | Male  | p-value | 55+          | 18 - 54 | p-value | Yes                | No    | p-value | Black             | White | p-value |
| Chores    | 2     | 0.257  | 0.169 | <0.001  | 0.182        | 0.226   | 0.091   | 0.185              | 0.211 | 0.500   | 0.244             | 0.201 | 0.420   |
|           | 3     | 0.232  | 0.231 | 0.048   | 0.183        | 0.263   | 0.005   | 0.220              | 0.231 | 0.567   | 0.256             | 0.218 | 0.360   |
|           | 4     | 1.546  | 0.846 | <0.001  | 1.347        | 1.072   | 0.565   | 1.386              | 1.126 | 0.601   | 1.437             | 1.057 | 0.136   |
|           | 5     | 4.408  | 3.321 | 0.009   | 5.092        | 3.349   | 0.069   | 5.014              | 3.851 | 0.436   | 8.443             | 3.567 | 0.025   |
| Stairs    | 2     | 0.183  | 0.154 | 0.157   | 0.149        | 0.179   | 0.122   | 0.175              | 0.165 | 0.912   | 0.281             | 0.146 | 0.006   |
|           | 3     | 0.191  | 0.209 | 0.795   | 0.169        | 0.219   | 0.035   | 0.273              | 0.190 | 0.347   | 0.317             | 0.162 | <0.001  |
|           | 4     | 0.968  | 0.538 | <0.001  | 0.828        | 0.684   | 0.788   | 1.015              | 0.689 | 0.106   | 0.951             | 0.616 | 0.001   |
|           | 5     | 2.326  | 1.281 | <0.001  | 1.463        | 1.822   | 0.296   | 3.087              | 1.655 | 0.033   | 3.483             | 1.477 | <0.001  |
| Walk      | 2     | 0.354  | 0.228 | <0.001  | 0.254        | 0.304   | 0.137   | 0.268              | 0.286 | 0.673   | 0.451             | 0.259 | 0.013   |
|           | 3     | 0.294  | 0.233 | 0.001   | 0.211        | 0.294   | 0.016   | 0.285              | 0.259 | 0.968   | 0.199             | 0.263 | 0.228   |
|           | 4     | 1.639  | 0.993 | <0.001  | 1.187        | 1.341   | 0.161   | 2.054              | 1.205 | 0.086   | 1.453             | 1.144 | 0.097   |
|           | 5     | 5.15   | 3.170 | <0.001  | 3.666        | 4.175   | 0.295   | 7.760              | 3.854 | 0.038   | 8.292             | 3.556 | 0.013   |
| Errands   | 2     | 0.348  | 0.223 | <0.001  | 0.278        | 0.282   | 0.870   | 0.368              | 0.267 | 0.172   | 0.256             | 0.255 | 0.938   |
|           | 3     | 0.298  | 0.223 | <0.001  | 0.252        | 0.264   | 0.734   | 0.361              | 0.244 | 0.065   | 0.429             | 0.210 | 0.035   |
|           | 4     | 3.387  | 1.625 | <0.001  | 2.949        | 2.128   | 0.036   | 3.539              | 2.283 | 0.050   | 1.781             | 2.317 | 0.596   |
|           | 5     | 15.716 | 5.949 | <0.001  | 19.154       | 7.333   | <0.001  | 13.532             | 9.654 | 0.243   | 9.493             | 9.953 | 0.994   |

Table 2. Value of Anxiety by Respondent Characteristics

| Attribute | Level | Gender |       |         | Age in Years |         |         | Hispanic Ethnicity |       |         | Non-Hispanic Race |       |         |
|-----------|-------|--------|-------|---------|--------------|---------|---------|--------------------|-------|---------|-------------------|-------|---------|
|           |       | Fem    | Male  | p-value | 55+          | 18 - 54 | p-value | Yes                | No    | p-value | Black             | White | p-value |
| Fearful   | 2     | 0.293  | 0.293 | 0.997   | 0.305        | 0.286   | 0.613   | 0.374              | 0.281 | 0.197   | 0.607             | 0.244 | <0.001  |
|           | 3     | 0.849  | 0.516 | 0.001   | 0.981        | 0.556   | <0.001  | 0.745              | 0.656 | 0.386   | 0.738             | 0.623 | 0.011   |
|           | 4     | 3.882  | 1.689 | <0.001  | 3.935        | 2.130   | <0.001  | 2.712              | 2.584 | 0.598   | 2.609             | 2.621 | 0.305   |
|           | 5     | 14.842 | 5.143 | <0.001  | 14.911       | 6.764   | <0.001  | 10.432             | 8.670 | 0.545   | 14.862            | 8.671 | 0.183   |
| Focus     | 2     | 0.374  | 0.347 | 0.507   | 0.361        | 0.360   | 0.975   | 0.417              | 0.351 | 0.459   | 0.508             | 0.329 | 0.036   |
|           | 3     | 0.867  | 0.600 | 0.006   | 0.993        | 0.634   | 0.005   | 1.103              | 0.684 | 0.047   | 0.692             | 0.678 | 0.300   |
|           | 4     | 3.483  | 1.756 | <0.001  | 3.307        | 2.207   | 0.004   | 4.135              | 2.330 | 0.022   | 2.047             | 2.365 | 0.918   |
|           | 5     | 9.299  | 3.888 | <0.001  | 8.885        | 5.027   | 0.004   | 4.211              | 6.435 | 0.718   | 10.005            | 6.497 | 0.355   |
| Worries   | 2     | 0.317  | 0.320 | 0.947   | 0.287        | 0.338   | 0.187   | 0.570              | 0.291 | 0.002   | 0.490             | 0.267 | 0.007   |
|           | 3     | 1.035  | 0.833 | 0.120   | 1.492        | 0.757   | <0.001  | 1.054              | 0.915 | 0.133   | 1.079             | 0.904 | 0.097   |
|           | 4     | 2.991  | 1.792 | <0.001  | 3.362        | 1.981   | <0.001  | 3.169              | 2.237 | 0.056   | 1.628             | 2.293 | 0.978   |
|           | 5     | 9.836  | 4.441 | <0.001  | 9.621        | 5.606   | 0.001   | 8.177              | 6.557 | 0.228   | 6.608             | 7.092 | 0.906   |
| Uneasy    | 2     | 0.169  | 0.164 | 0.835   | 0.149        | 0.174   | 0.261   | 0.297              | 0.151 | 0.014   | 0.258             | 0.137 | 0.019   |
|           | 3     | 0.413  | 0.377 | 0.535   | 0.423        | 0.379   | 0.834   | 0.517              | 0.378 | 0.060   | 0.574             | 0.350 | 0.005   |
|           | 4     | 1.357  | 0.667 | <0.001  | 1.356        | 0.817   | 0.004   | 1.223              | 0.923 | 0.028   | 0.889             | 0.884 | 0.110   |
|           | 5     | 5.217  | 1.728 | <0.001  | 4.537        | 2.545   | 0.001   | 4.751              | 2.898 | 0.034   | 2.664             | 3.029 | 0.565   |

Table 3. Value of Depression by Respondent Characteristics

| Attribute | Level | Gender |       |         | Age in Years |         |         | Hispanic Ethnicity |       |         | Non-Hispanic Race |       |         |
|-----------|-------|--------|-------|---------|--------------|---------|---------|--------------------|-------|---------|-------------------|-------|---------|
|           |       | Fem    | Male  | p-value | 55+          | 18 - 54 | p-value | Yes                | No    | p-value | Black             | White | p-value |
| Worthless | 2     | 0.287  | 0.230 | 0.022   | 0.263        | 0.257   | 0.870   | 0.333              | 0.247 | 0.141   | 0.348             | 0.234 | 0.027   |
|           | 3     | 0.591  | 0.433 | 0.001   | 0.636        | 0.461   | 0.014   | 0.778              | 0.479 | 0.008   | 0.618             | 0.450 | 0.016   |
|           | 4     | 2.123  | 1.123 | <0.001  | 1.815        | 1.47    | 0.041   | 2.223              | 1.507 | 0.034   | 1.593             | 1.447 | 0.169   |
|           | 5     | 7.519  | 2.483 | <0.001  | 4.967        | 4.201   | 0.140   | 6.976              | 4.203 | 0.062   | 3.899             | 4.228 | 0.662   |
| Helpless  | 2     | 0.201  | 0.192 | 0.685   | 0.251        | 0.175   | 0.001   | 0.167              | 0.200 | 0.399   | 0.262             | 0.190 | 0.131   |
|           | 3     | 0.347  | 0.352 | 0.938   | 0.512        | 0.294   | <0.001  | 0.336              | 0.348 | 0.625   | 0.439             | 0.333 | 0.051   |
|           | 4     | 1.333  | 0.915 | 0.007   | 1.697        | 0.921   | <0.001  | 1.536              | 1.065 | 0.265   | 0.856             | 1.049 | 0.863   |
|           | 5     | 3.857  | 1.629 | <0.001  | 2.960        | 2.390   | 0.002   | 5.450              | 2.328 | 0.034   | 2.896             | 2.296 | 0.337   |
| Depressed | 2     | 0.271  | 0.283 | 0.728   | 0.284        | 0.275   | 0.769   | 0.482              | 0.257 | 0.002   | 0.322             | 0.244 | 0.182   |
|           | 3     | 0.715  | 0.501 | 0.008   | 0.825        | 0.522   | <0.001  | 0.824              | 0.583 | 0.003   | 0.638             | 0.567 | 0.247   |
|           | 4     | 2.931  | 1.795 | <0.001  | 3.331        | 1.959   | <0.001  | 4.849              | 2.085 | <0.001  | 2.080             | 2.107 | 0.699   |
|           | 5     | 8.983  | 3.68  | <0.001  | 7.125        | 5.347   | 0.007   | 12.710             | 5.378 | 0.001   | 6.008             | 5.181 | 0.509   |
| Hopeless  | 2     | 0.274  | 0.217 | 0.031   | 0.270        | 0.234   | 0.199   | 0.335              | 0.234 | 0.087   | 0.237             | 0.230 | 0.907   |
|           | 3     | 0.452  | 0.378 | 0.027   | 0.521        | 0.377   | 0.010   | 0.838              | 0.373 | <0.001  | 0.427             | 0.353 | 0.439   |
|           | 4     | 2.441  | 1.208 | <0.001  | 2.706        | 1.424   | <0.001  | 2.242              | 1.685 | 0.030   | 1.283             | 1.715 | 0.377   |
|           | 5     | 6.049  | 3.077 | <0.001  | 5.008        | 4.122   | 0.015   | 7.448              | 4.141 | 0.031   | 3.649             | 4.338 | 0.611   |

Table 4. Value of Fatigue by Respondent Characteristics

| Attribute    | Level    | Gender |        |         | Age in Years |         |         | Hispanic Ethnicity |       |         | Non-Hispanic Race |       |         |
|--------------|----------|--------|--------|---------|--------------|---------|---------|--------------------|-------|---------|-------------------|-------|---------|
|              |          | Fem    | Male   | p-value | 55+          | 18 - 54 | p-value | Yes                | No    | p-value | Black             | White | p-value |
| Fatigue      | 2        | 0.293  | 0.247  | 0.183   | 0.306        | 0.252   | 0.168   | 0.441              | 0.333 | 0.022   | 0.274             | 0.242 | 0.649   |
|              | 3        | 0.169  | 0.146  | 0.125   | 0.181        | 0.147   | 0.081   | 0.156              | 0.778 | 0.062   | 0.163             | 0.147 | 0.563   |
|              | 4        | 0.964  | 0.708  | 0.012   | 1.072        | 0.734   | 0.004   | 0.700              | 2.223 | 0.434   | 0.508             | 0.904 | 0.192   |
|              | 5        | 0.785  | 0.514  | 0.002   | 0.634        | 0.644   | 0.022   | 0.890              | 6.976 | 0.093   | 0.814             | 0.576 | 0.994   |
|              | Starting | 2      | 0.398  | 0.324   | 0.066        | 0.509   | 0.306   | <0.001             | 0.330 | 0.167   | 0.602             | 0.389 | 0.349   |
| Run-Down     | 3        | 0.165  | 0.161  | 0.114   | 0.175        | 0.158   | <0.001  | 0.191              | 0.336 | 0.954   | 0.130             | 0.154 | 0.869   |
|              | 4        | 0.735  | 0.49   | 0.002   | 0.725        | 0.557   | <0.001  | 0.698              | 1.536 | 0.807   | 0.514             | 0.590 | 0.932   |
|              | 5        | 0.508  | 0.436  | 0.007   | 0.422        | 0.504   | <0.001  | 0.746              | 5.450 | 0.473   | 0.455             | 0.443 | 0.915   |
|              | 2        | 0.421  | 0.287  | 0.003   | 0.462        | 0.307   | 0.003   | 0.403              | 0.482 | 0.520   | 0.518             | 0.314 | 0.048   |
|              | 3        | 0.208  | 0.167  | 0.001   | 0.209        | 0.177   | 0.002   | 0.174              | 0.824 | 0.670   | 0.164             | 0.183 | 0.112   |
| Average Fat. | 4        | 0.789  | 0.511  | <0.001  | 0.855        | 0.555   | <0.001  | 0.533              | 4.849 | 0.970   | 0.483             | 0.677 | 0.486   |
|              | 5        | 0.761  | 0.494  | <0.001  | 0.559        | 0.651   | 0.001   | 0.703              | 12.71 | 0.706   | 0.641             | 0.578 | 0.229   |
|              | 2        | 0.263  | 0.201  | 0.069   | 0.251        | 0.223   | 0.460   | 0.444              | 0.335 | 0.007   | 0.194             | 0.196 | 0.905   |
|              | 3        | 0.212  | 0.172  | 0.026   | 0.196        | 0.191   | 0.540   | 0.193              | 0.838 | 0.027   | 0.191             | 0.175 | 0.855   |
|              | 4        | 0.857  | 0.462  | <0.001  | 0.848        | 0.554   | 0.014   | 0.722              | 2.242 | 0.052   | 0.593             | 0.615 | 0.952   |
| 5            | 0.747    | 0.498  | <0.001 | 0.501   | 0.688        | 0.378   | 0.954   | 7.448              | 0.011 | 0.591   | 0.575             | 0.938 |         |

Table 5. Value of Sleep Disturbance by Respondent Characteristics

| Attribute  | Level | Gender |       |         | Age in Years |         |         | Hispanic Ethnicity |       |         | Non-Hispanic Race |       |         |
|------------|-------|--------|-------|---------|--------------|---------|---------|--------------------|-------|---------|-------------------|-------|---------|
|            |       | Fem    | Male  | p-value | 55+          | 18 - 54 | p-value | Yes                | No    | p-value | Black             | White | p-value |
| Quality    | 2     | 0.162  | 0.201 | 0.134   | 0.197        | 0.178   | 0.552   | 0.201              | 0.178 | 0.717   | 0.234             | 0.168 | 0.252   |
|            | 3     | 0.821  | 0.562 | 0.013   | 0.841        | 0.623   | 0.013   | 0.911              | 0.657 | 0.118   | 0.910             | 0.623 | 0.039   |
|            | 4     | 2.313  | 1.633 | 0.009   | 2.189        | 1.857   | 0.087   | 2.649              | 1.891 | 0.084   | 3.549             | 1.680 | 0.002   |
|            | 5     | 2.161  | 1.323 | 0.001   | 1.691        | 1.723   | 0.140   | 3.764              | 1.553 | 0.005   | 1.404             | 1.530 | 0.014   |
| Refreshing | 2     | 0.222  | 0.206 | 0.584   | 0.190        | 0.230   | 0.158   | 0.438              | 0.192 | 0.002   | 0.272             | 0.178 | 0.157   |
|            | 3     | 0.530  | 0.355 | 0.002   | 0.513        | 0.410   | 0.370   | 0.509              | 0.429 | 0.027   | 0.356             | 0.432 | 0.921   |
|            | 4     | 0.310  | 0.277 | 0.023   | 0.277        | 0.308   | 0.921   | 0.364              | 0.282 | 0.011   | 0.228             | 0.280 | 0.807   |
|            | 5     | 3.079  | 1.847 | <0.001  | 2.938        | 2.179   | 0.074   | 4.042              | 2.253 | 0.002   | 2.507             | 2.180 | 0.457   |
| Problem    | 2     | 0.388  | 0.429 | 0.429   | 0.465        | 0.384   | 0.122   | 0.628              | 0.382 | 0.029   | 0.716             | 0.335 | 0.001   |
|            | 3     | 0.228  | 0.260 | 0.272   | 0.269        | 0.238   | 0.113   | 0.417              | 0.225 | 0.004   | 0.266             | 0.206 | 0.002   |
|            | 4     | 0.975  | 0.688 | 0.308   | 1.344        | 0.659   | <0.001  | 0.877              | 0.798 | 0.043   | 0.737             | 0.792 | 0.032   |
|            | 5     | 0.684  | 0.406 | 0.252   | 0.464        | 0.573   | 0.006   | 1.267              | 0.467 | 0.002   | 0.420             | 0.461 | 0.016   |
| Difficulty | 2     | 0.195  | 0.227 | 0.203   | 0.256        | 0.194   | 0.031   | 0.302              | 0.199 | 0.085   | 0.430             | 0.171 | <0.001  |
|            | 3     | 0.167  | 0.192 | 0.143   | 0.206        | 0.174   | 0.041   | 0.252              | 0.173 | 0.047   | 0.216             | 0.158 | 0.001   |
|            | 4     | 0.470  | 0.339 | 0.679   | 0.560        | 0.343   | 0.001   | 0.350              | 0.401 | 0.260   | 0.439             | 0.385 | 0.004   |
|            | 5     | 0.466  | 0.380 | 0.843   | 0.385        | 0.446   | 0.022   | 0.910              | 0.371 | 0.014   | 0.581             | 0.333 | 0.001   |

Table 6. Value of Social Functioning by Respondent Characteristics

| Attribute | Level | Gender |       |         | Age in Years |         |         | Hispanic Ethnicity |       |         | Non-Hispanic Race |       |         |
|-----------|-------|--------|-------|---------|--------------|---------|---------|--------------------|-------|---------|-------------------|-------|---------|
|           |       | Fem    | Male  | p-value | 55+          | 18 - 54 | p-value | Yes                | No    | p-value | Black             | White | p-value |
| Amount    | 2     | 0.105  | 0.092 | 0.574   | 0.077        | 0.112   | 0.085   | 0.196              | 0.089 | 0.062   | 0.122             | 0.082 | 0.336   |
|           | 3     | 0.190  | 0.170 | 0.361   | 0.164        | 0.189   | 0.070   | 0.175              | 0.179 | 0.226   | 0.126             | 0.176 | 0.848   |
|           | 4     | 0.167  | 0.159 | 0.392   | 0.156        | 0.169   | 0.058   | 0.225              | 0.155 | 0.070   | 0.134             | 0.154 | 0.967   |
|           | 5     | 0.920  | 0.566 | 0.004   | 0.604        | 0.801   | 0.007   | 0.966              | 0.697 | 0.040   | 0.980             | 0.640 | 0.177   |
| Work      | 2     | 0.115  | 0.110 | 0.869   | 0.091        | 0.126   | 0.118   | 0.116              | 0.110 | 0.970   | 0.161             | 0.102 | 0.250   |
|           | 3     | 0.201  | 0.183 | 0.570   | 0.172        | 0.203   | 0.055   | 0.261              | 0.181 | 0.275   | 0.176             | 0.171 | 0.369   |
|           | 4     | 0.174  | 0.189 | 0.888   | 0.169        | 0.191   | 0.049   | 0.274              | 0.170 | 0.155   | 0.149             | 0.170 | 0.454   |
|           | 5     | 1.254  | 0.772 | 0.006   | 0.922        | 1.019   | 0.087   | 2.095              | 0.888 | <0.001  | 1.065             | 0.860 | 0.186   |
| Personal  | 2     | 0.118  | 0.131 | 0.426   | 0.115        | 0.130   | 0.290   | 0.185              | 0.116 | 0.085   | 0.156             | 0.106 | 0.132   |
|           | 3     | 0.236  | 0.190 | 0.309   | 0.256        | 0.197   | 0.252   | 0.275              | 0.204 | 0.071   | 0.130             | 0.206 | 0.584   |
|           | 4     | 0.197  | 0.141 | 0.183   | 0.176        | 0.165   | 0.582   | 0.180              | 0.162 | 0.085   | 0.108             | 0.162 | 0.712   |
|           | 5     | 1.657  | 0.994 | <0.001  | 1.332        | 1.261   | 0.492   | 1.757              | 1.230 | 0.026   | 1.586             | 1.191 | 0.292   |
| Routine   | 2     | 0.121  | 0.134 | 0.481   | 0.103        | 0.142   | 0.030   | 0.203              | 0.117 | 0.059   | 0.122             | 0.110 | 0.796   |
|           | 3     | 0.245  | 0.203 | 0.403   | 0.242        | 0.216   | 0.639   | 0.241              | 0.220 | 0.191   | 0.147             | 0.221 | 0.237   |
|           | 4     | 0.179  | 0.173 | 0.729   | 0.192        | 0.173   | 0.531   | 0.239              | 0.170 | 0.073   | 0.146             | 0.166 | 0.467   |
|           | 5     | 1.774  | 1.069 | 0.001   | 1.376        | 1.403   | 0.658   | 1.921              | 1.321 | 0.035   | 1.149             | 1.328 | 0.414   |

Table 7. Value of Pain Interference by Respondent Characteristics

| Attribute       | Level | Gender |       |         | Age in Years |         | Hispanic Ethnicity |       |       | Non-Hispanic Race |       |       |         |
|-----------------|-------|--------|-------|---------|--------------|---------|--------------------|-------|-------|-------------------|-------|-------|---------|
|                 |       | Fem    | Male  | p-value | 55+          | 18 - 54 | p-value            | Yes   | No    | p-value           | Black | White | p-value |
| Day-to-day      | 2     | 0.083  | 0.110 | 0.257   | 0.087        | 0.095   | 0.676              | 0.049 | 0.101 | 0.158             | 0.073 | 0.098 | 0.536   |
|                 | 3     | 0.132  | 0.125 | 0.556   | 0.099        | 0.145   | 0.088              | 0.116 | 0.131 | 0.215             | 0.152 | 0.121 | 0.987   |
|                 | 4     | 0.658  | 0.432 | 0.076   | 0.595        | 0.512   | 0.852              | 0.463 | 0.536 | 0.244             | 0.794 | 0.502 | 0.186   |
|                 | 5     | 0.493  | 0.351 | 0.099   | 0.449        | 0.410   | 0.968              | 0.591 | 0.392 | 0.675             | 0.479 | 0.357 | 0.235   |
| Home            | 2     | 0.050  | 0.074 | 0.192   | 0.049        | 0.065   | 0.323              | 0.076 | 0.058 | 0.647             | 0.086 | 0.052 | 0.429   |
|                 | 3     | 0.067  | 0.083 | 0.112   | 0.063        | 0.082   | 0.129              | 0.071 | 0.075 | 0.840             | 0.075 | 0.071 | 0.514   |
|                 | 4     | 0.263  | 0.195 | 0.948   | 0.242        | 0.220   | 0.579              | 0.285 | 0.217 | 0.450             | 0.314 | 0.201 | 0.147   |
|                 | 5     | 0.239  | 0.213 | 0.775   | 0.242        | 0.224   | 0.52               | 0.393 | 0.205 | 0.176             | 0.288 | 0.182 | 0.111   |
| Soc. Activities | 2     | 0.104  | 0.116 | 0.556   | 0.094        | 0.117   | 0.234              | 0.154 | 0.104 | 0.379             | 0.185 | 0.091 | 0.135   |
|                 | 3     | 0.062  | 0.069 | 0.503   | 0.055        | 0.073   | 0.134              | 0.08  | 0.064 | 0.438             | 0.071 | 0.059 | 0.203   |
|                 | 4     | 0.266  | 0.197 | 0.585   | 0.266        | 0.217   | 0.756              | 0.301 | 0.218 | 0.232             | 0.35  | 0.199 | 0.040   |
|                 | 5     | 0.244  | 0.215 | 0.810   | 0.244        | 0.228   | 0.563              | 0.397 | 0.208 | 0.105             | 0.219 | 0.192 | 0.075   |
| Enjoyment       | 2     | 0.228  | 0.244 | 0.656   | 0.178        | 0.265   | 0.008              | 0.288 | 0.229 | 0.495             | 0.352 | 0.207 | 0.110   |
|                 | 3     | 0.142  | 0.192 | 0.216   | 0.130        | 0.184   | 0.005              | 0.168 | 0.164 | 0.651             | 0.132 | 0.164 | 0.380   |
|                 | 4     | 1.254  | 0.639 | 0.001   | 1.151        | 0.790   | 0.393              | 0.761 | 0.889 | 0.911             | 0.890 | 0.903 | 0.496   |
|                 | 5     | 0.787  | 0.496 | 0.004   | 0.660        | 0.621   | 0.866              | 0.851 | 0.595 | 0.523             | 0.487 | 0.589 | 0.522   |

Table 8. Value of All Domains by Respondent Characteristics

| Attribute                                                     | Level | Gender |        |         | Age in Years |         |         | Hispanic Ethnicity |        |         | Non-Hispanic Race |        |         |
|---------------------------------------------------------------|-------|--------|--------|---------|--------------|---------|---------|--------------------|--------|---------|-------------------|--------|---------|
|                                                               |       | Fem    | Male   | p-value | 55+          | 18 - 54 | p-value | Yes                | No     | p-value | Black             | White  | p-value |
| Physical Functioning                                          | 2     | 1.141  | 0.773  | <0.001  | 0.863        | 0.991   | 0.104   | 0.995              | 0.928  | 0.788   | 1.232             | 0.860  | 0.021   |
|                                                               | 3     | 1.015  | 0.897  | 0.001   | 0.815        | 1.039   | 0.017   | 1.140              | 0.925  | 0.401   | 1.202             | 0.852  | 0.012   |
|                                                               | 4     | 7.539  | 4.002  | <0.001  | 6.311        | 5.225   | 0.380   | 7.995              | 5.303  | 0.051   | 5.622             | 5.134  | 0.186   |
|                                                               | 5     | 27.600 | 13.722 | <0.001  | 29.376       | 16.679  | 0.006   | 29.394             | 19.014 | 0.121   | 29.711            | 18.553 | 0.120   |
| Anxiety                                                       | 2     | 1.154  | 1.125  | 0.758   | 1.102        | 1.158   | 0.554   | 1.658              | 1.074  | 0.013   | 1.863             | 0.977  | <0.001  |
|                                                               | 3     | 3.163  | 2.327  | 0.003   | 3.889        | 2.326   | <0.001  | 3.419              | 2.633  | 0.022   | 3.083             | 2.555  | 0.013   |
|                                                               | 4     | 11.713 | 5.905  | <0.001  | 11.960       | 7.134   | <0.001  | 11.240             | 8.075  | 0.054   | 7.173             | 8.163  | 0.513   |
|                                                               | 5     | 39.195 | 15.201 | <0.001  | 37.955       | 19.942  | <0.001  | 27.571             | 24.561 | 0.343   | 34.139            | 25.289 | 0.346   |
| Depression                                                    | 2     | 1.033  | 0.921  | 0.042   | 1.067        | 0.941   | 0.034   | 1.316              | 0.938  | 0.001   | 1.169             | 0.898  | 0.011   |
|                                                               | 3     | 2.105  | 1.663  | <0.001  | 2.495        | 1.654   | <0.001  | 2.775              | 1.782  | <0.001  | 2.121             | 1.702  | 0.012   |
|                                                               | 4     | 8.828  | 5.041  | <0.001  | 9.548        | 5.774   | <0.001  | 10.850             | 6.341  | <0.001  | 5.812             | 6.318  | 0.704   |
|                                                               | 5     | 26.408 | 10.869 | <0.001  | 20.060       | 16.059  | 0.010   | 32.584             | 16.051 | 0.008   | 16.452            | 16.043 | 0.690   |
| Fatigue                                                       | 2     | 1.374  | 1.058  | 0.003   | 1.528        | 1.089   | <0.001  | 1.618              | 1.164  | 0.043   | 1.374             | 1.101  | 0.154   |
|                                                               | 3     | 0.753  | 0.646  | 0.005   | 0.760        | 0.673   | 0.001   | 0.713              | 0.690  | 0.125   | 0.648             | 0.658  | 0.302   |
|                                                               | 4     | 3.346  | 2.171  | <0.001  | 3.500        | 2.399   | <0.001  | 2.654              | 2.727  | 0.291   | 2.097             | 2.786  | 0.866   |
|                                                               | 5     | 2.801  | 1.941  | <0.001  | 2.116        | 2.487   | 0.002   | 3.292              | 2.239  | 0.077   | 2.502             | 2.171  | 0.558   |
| Sleep                                                         | 2     | 0.967  | 1.063  | 0.316   | 1.108        | 0.987   | 0.244   | 1.570              | 0.951  | 0.005   | 1.653             | 0.852  | <0.001  |
|                                                               | 3     | 1.746  | 1.370  | 0.162   | 1.829        | 1.444   | 0.029   | 2.089              | 1.484  | 0.009   | 1.748             | 1.419  | 0.007   |
|                                                               | 4     | 4.069  | 2.938  | 0.013   | 4.370        | 3.167   | 0.001   | 4.240              | 3.371  | 0.015   | 4.953             | 3.137  | 0.001   |
|                                                               | 5     | 6.390  | 3.956  | 0.002   | 5.478        | 4.921   | 0.021   | 9.984              | 4.645  | <0.001  | 4.911             | 4.503  | 0.004   |
| Social Functioning                                            | 2     | 0.459  | 0.467  | 0.834   | 0.386        | 0.510   | 0.008   | 0.700              | 0.432  | 0.028   | 0.561             | 0.400  | 0.116   |
|                                                               | 3     | 0.872  | 0.746  | 0.268   | 0.834        | 0.806   | 0.318   | 0.951              | 0.783  | 0.071   | 0.578             | 0.774  | 0.827   |
|                                                               | 4     | 0.717  | 0.662  | 0.419   | 0.693        | 0.698   | 0.209   | 0.918              | 0.658  | 0.033   | 0.537             | 0.652  | 0.998   |
|                                                               | 5     | 5.606  | 3.401  | <0.001  | 4.234        | 4.485   | 0.280   | 6.740              | 4.137  | 0.002   | 4.780             | 4.018  | 0.343   |
| Pain Interference                                             | 2     | 0.465  | 0.544  | 0.231   | 0.408        | 0.543   | 0.024   | 0.567              | 0.492  | 0.608   | 0.696             | 0.447  | 0.089   |
|                                                               | 3     | 0.404  | 0.469  | 0.220   | 0.348        | 0.484   | 0.015   | 0.434              | 0.434  | 0.848   | 0.429             | 0.415  | 0.324   |
|                                                               | 4     | 2.441  | 1.464  | 0.011   | 2.255        | 1.740   | 0.730   | 1.810              | 1.860  | 0.923   | 2.348             | 1.806  | 0.090   |
|                                                               | 5     | 1.764  | 1.275  | 0.059   | 1.595        | 1.482   | 0.723   | 2.232              | 1.399  | 0.360   | 1.473             | 1.321  | 0.115   |
| Pain Intensity on a scale From 0 (no pain) to 10 (worst pain) | 1     | 0.149  | 0.134  | 0.396   | 0.151        | 0.136   | 0.407   | 0.152              | 0.141  | 0.715   | 0.245             | 0.129  | 0.004   |
|                                                               | 2     | 0.153  | 0.151  | 0.523   | 0.147        | 0.156   | 0.841   | 0.170              | 0.151  | 0.505   | 0.254             | 0.135  | <0.001  |
|                                                               | 3     | 0.216  | 0.251  | 0.608   | 0.220        | 0.238   | 0.688   | 0.312              | 0.221  | 0.132   | 0.171             | 0.216  | 0.007   |
|                                                               | 4     | 0.784  | 0.480  | 0.121   | 0.766        | 0.577   | 0.358   | 1.018              | 0.576  | 0.136   | 0.956             | 0.522  | 0.062   |
|                                                               | 5     | 0.925  | 0.865  | 0.139   | 0.943        | 0.911   | 0.409   | 0.894              | 0.892  | 0.281   | 1.024             | 0.844  | 0.060   |
|                                                               | 6     | 0.924  | 0.828  | 0.142   | 0.664        | 1.005   | 0.633   | 0.582              | 0.905  | 0.677   | 0.982             | 0.858  | 0.100   |
|                                                               | 7     | 1.369  | 1.178  | 0.107   | 1.153        | 1.378   | 0.337   | 1.568              | 1.245  | 0.473   | 1.561             | 1.173  | 0.066   |
|                                                               | 8     | 2.467  | 1.806  | 0.012   | 2.000        | 2.205   | 0.292   | 3.065              | 2.010  | 0.166   | 1.476             | 2.013  | 0.389   |
|                                                               | 9     | 4.477  | 2.685  | <0.001  | 3.678        | 3.444   | 0.718   | 4.547              | 3.352  | 0.077   | 2.336             | 3.470  | 0.797   |
|                                                               | 10    | 7.426  | 4.228  | <0.001  | 6.575        | 5.233   | 0.469   | 2.733              | 6.086  | 0.967   | 5.329             | 6.299  | 0.681   |

Table 9 Attribute Descriptions by Item and Level

|         |   | <u>Physical Functioning</u>                                                      |
|---------|---|----------------------------------------------------------------------------------|
| Chores  | 1 | Able to do chores such as vacuuming or yard work <b>without any</b> difficulty   |
|         | 2 | Able to do chores such as vacuuming or yard work with <b>a little</b> difficulty |
|         | 3 | Able to do chores such as vacuuming or yard work with <b>some</b> difficulty     |
|         | 4 | Able to do chores such as vacuuming or yard work with <b>much</b> difficulty     |
|         | 5 | <b>Unable</b> to do chores such as vacuuming or yard work                        |
| Stairs  | 1 | Able to go up and down stairs at a normal pace <b>without any</b> difficulty     |
|         | 2 | Able to go up and down stairs at a normal pace with <b>a little</b> difficulty   |
|         | 3 | Able to go up and down stairs at a normal pace with <b>some</b> difficulty       |
|         | 4 | Able to go up and down stairs at a normal pace with <b>much</b> difficulty       |
|         | 5 | <b>Unable</b> to go up and down stairs at a normal pace                          |
| Walk    | 1 | Able to go for a walk of at least 15 minutes <b>without any</b> difficulty       |
|         | 2 | Able to go for a walk of at least 15 minutes with <b>a little</b> difficulty     |
|         | 3 | Able to go for a walk of at least 15 minutes with <b>some</b> difficulty         |
|         | 4 | Able to go for a walk of at least 15 minutes with <b>much</b> difficulty         |
|         | 5 | <b>Unable</b> to go for a walk of 15 minutes                                     |
| Errands | 1 | Able to run errands and shop <b>without any</b> difficulty                       |
|         | 2 | Able to run errands and shop with <b>a little</b> difficulty                     |
|         | 3 | Able to run errands and shop with <b>some</b> difficulty                         |
|         | 4 | Able to run errands and shop with <b>much</b> difficulty                         |
|         | 5 | <b>Unable</b> to run errands and shop                                            |

|         |   | <u>Anxiety</u>                                                             |
|---------|---|----------------------------------------------------------------------------|
| Fearful | 1 | <b>Not</b> feel fearful                                                    |
|         | 2 | <b>Rarely</b> feel fearful                                                 |
|         | 3 | <b>Sometimes</b> feel fearful                                              |
|         | 4 | <b>Often</b> feel fearful                                                  |
|         | 5 | <b>Always</b> feel fearful                                                 |
| Focus   | 1 | <b>Not</b> find it hard to focus on anything other than your anxiety       |
|         | 2 | <b>Rarely</b> find it hard to focus on anything other than your anxiety    |
|         | 3 | <b>Sometimes</b> find it hard to focus on anything other than your anxiety |
|         | 4 | <b>Often</b> find it hard to focus on anything other than your anxiety     |
|         | 5 | <b>Always</b> find it hard to focus on anything other than your anxiety    |

Worries 1 **Not** have worries that overwhelm you  
2 **Rarely** have worries that overwhelm you  
3 **Sometimes** have worries that overwhelm you  
4 **Often** have worries that overwhelm you  
5 **Always** have worries that overwhelm you

Uneasy 1 **Not** feel uneasy  
2 **Rarely** feel uneasy  
3 **Sometimes** feel uneasy  
4 **Often** feel uneasy  
5 **Always** feel uneasy

#### Depression

Worthless 1 **Not** feel worthless  
2 **Rarely** feel worthless  
3 **Sometimes** feel worthless  
4 **Often** feel worthless  
5 **Always** feel worthless

Helpless 1 **Not** feel helpless  
2 **Rarely** feel helpless  
3 **Sometimes** feel helpless  
4 **Often** feel helpless  
5 **Always** feel helpless

Depressed 1 **Not** feel depressed  
2 **Rarely** feel depressed  
3 **Sometimes** feel depressed  
4 **Often** feel depressed  
5 **Always** feel depressed

Hopeless 1 **Not** feel hopeless  
2 **Rarely** feel hopeless  
3 **Sometimes** feel hopeless  
4 **Often** feel hopeless  
5 **Always** feel hopeless

#### Fatigue

Fatigued 1 **Not** feel fatigued  
2 Feel **a little bit** fatigued  
3 Feel **somewhat** fatigued  
4 Feel **quite a bit** fatigued  
5 Feel **very much** fatigued

Starting 1 **No** trouble starting things because you  
are tired  
2 **A little bit** of trouble starting things because you  
are tired  
3 **Somewhat** trouble starting things because you  
are tired  
4 **Quite a bit** of trouble starting things because you  
are tired  
5 **Very much** trouble starting things because you  
are tired

Run-Down 1 **Not** feel run-down on average  
2 Feel **a little bit** run-down on average  
3 Feel **somewhat** run-down on average  
4 Feel **quite a bit** run-down on average  
5 Feel **very much** run-down on average

- Fatigue Ave
- 1 **Not** feel fatigued on average
  - 2 Feel **a little bit** fatigued on average
  - 3 Feel **somewhat** fatigued on average
  - 4 Feel **quite a bit** fatigued on average
  - 5 Feel **very much** fatigued on average

Sleep

- Quality
- 1 **Very good** sleep quality
  - 2 **Good** sleep quality
  - 3 **Fair** sleep quality
  - 4 **Poor** sleep quality
  - 5 **Very poor** sleep quality
- Refreshing
- 1 Sleep that is **very much** refreshing
  - 2 Sleep that is **quite a bit** refreshing
  - 3 Sleep that is **somewhat** refreshing
  - 4 Sleep that is **a little bit** refreshing
  - 5 Sleep that is **not** refreshing
- Problem
- 1 **No** problem with your sleep
  - 2 **A little bit of** a problem with your sleep
  - 3 **Somewhat** of a problem with your sleep
  - 4 **Quite a bit** of a problem with your sleep
  - 5 **Very much** of a problem with your sleep
- Difficulty
- 1 **No** difficulty falling asleep
  - 2 **A little bit** of difficulty falling asleep
  - 3 **Somewhat** difficulty falling asleep
  - 4 **Quite a bit** of difficulty falling asleep
  - 5 **Very much** difficulty falling asleep

Social Functioning

- Amount
- 1 **Very much** satisfied with how much work you can do (including work at home)
  - 2 **Quite a bit** satisfied with how much work you can do (including work at home)
  - 3 **Somewhat** satisfied with how much work you can do (including work at home)
  - 4 **A little bit** satisfied with how much work you can do (including work at home)
  - 5 **Not** satisfied with how much work you can do (including work at home)
- Work
- 1 **Very much** satisfied with your ability to work (including work at home)
  - 2 **Quite a bit** satisfied with your ability to work (including work at home)
  - 3 **Somewhat** satisfied with your ability to work (including work at home)
  - 4 **A little bit** satisfied with your ability to work (including work at home)
  - 5 **Not** satisfied with your ability to work (including work at home)
- Personal
- 1 **Very much** satisfied with your ability to do regular personal and household responsibilities
  - 2 **Quite a bit** satisfied with your ability to do regular personal and household responsibilities
  - 3 **Somewhat** satisfied with your ability to do regular personal and household responsibilities



- 4 **A little bit** satisfied with your ability to do regular personal and household responsibilities
- 5 **Not** satisfied with your ability to do regular personal and household responsibilities
- Routine 1 **Very much** satisfied with your ability to perform your daily routine
- 2 **Quite a bit** satisfied with your ability to perform your daily routine
- 3 **Somewhat** satisfied with your ability to perform your daily routine
- 4 **A little bit** satisfied with your ability to perform your daily routine
- 5 **Not** satisfied with your ability to perform your daily routine

Pain Interference

- Day to day 1 Pain **does not** interfere with your day to day activities
- 2 Pain interferes **a little bit** with your day to day activities
- 3 Pain interferes **somewhat** with your day to day activities
- 4 Pain interferes **quite a bit** with your day to day activities
- 5 Pain interferes **very much** with your day to day activities
- Home 1 Pain **does not** interfere with work around the home
- 2 Pain interferes **a little bit** with work around the home
- 3 Pain interferes **somewhat** with work around the home
- 4 Pain interferes **quite a bit** with work around the home
- 5 Pain interferes **very much** with work around the home
- Social Activities 1 Pain **does not** interfere with your ability to participate in social activities
- 2 Pain interferes **a little bit** with your ability to participate in social activities
- 3 Pain interferes **somewhat** with your ability to participate in social activities
- 4 Pain interferes **quite a bit** with your ability to participate in social activities
- 5 Pain interferes **very much** with your ability to participate in social activities
- Enjoyment 1 Pain **does not** interfere with your enjoyment of life
- 2 Pain interferes **a little bit** with your enjoyment of life
- 3 Pain interferes **somewhat** with your enjoyment of life
- 4 Pain interferes **quite a bit** with your enjoyment of life
- 5 Pain interferes **very much** with your enjoyment of life

Pain Intensity

- Pain Levels
- 1 Pain of **0** on a scale from 0 (no pain) to 10 (worst imaginable pain)
  - 2 Pain of **1** on a scale from 0 (no pain) to 10 (worst imaginable pain)
  - 3 Pain of **2** on a scale from 0 (no pain) to 10 (worst imaginable pain)
  - 4 Pain of **3** on a scale from 0 (no pain) to 10 (worst imaginable pain)
  - 5 Pain of **4** on a scale from 0 (no pain) to 10 (worst imaginable pain)
  - 6 Pain of **5** on a scale from 0 (no pain) to 10 (worst imaginable pain)
  - 7 Pain of **6** on a scale from 0 (no pain) to 10 (worst imaginable pain)
  - 8 Pain of **7** on a scale from 0 (no pain) to 10 (worst imaginable pain)
  - 9 Pain of **8** on a scale from 0 (no pain) to 10 (worst imaginable pain)
  - 10 Pain of **9** on a scale from 0 (no pain) to 10 (worst imaginable pain)
  - 11 Pain of **10** on a scale from 0 (no pain) to 10 (worst imaginable pain)
